# Supplementary material for: Establishment and Validation of a 5 m6A RNA Methylation Regulatory Gene Prognostic Model in Low-Grade Glioma
Source: Front Genet. 2022 Feb 25;13:655169. doi: 10.3389/fgene.2022.655169 (PMC8914514; doi:10.3389/fgene.2022.655169)
Supplement: Supplementary file 1 [file DataSheet1.CSV]

gene	HR	z	pvalue	lower	upper
signature	3.152554523	9.908529812	3.82E-23	2.512026895	3.956406693
WHO.grade	3.531438814	5.792331401	6.94E-09	2.304305531	5.41206881
X1p19q_Codeletion_status	0.155539891	-5.72044926	1.06E-08	0.082214285	0.294263434
IDH.1 mutation	0.378763446	-4.340017461	1.42E-05	0.244319369	0.587189416
Gender	1.552464847	2.082142648	0.037329442	1.026145685	2.348737744
